# Supplementary material for: Assessment of HMGA2 and PLAG1 rearrangements in breast adenomyoepitheliomas
Source: PubMed Central journal article supplement (PMC6338730; doi:10.1038/s41523-018-0101-7), 2019-01-18
Supplement: 41523_2018_101_MOESM1_ESM.pdf [file 41523_2018_101_MOESM1_ESM.pdf]

## SUPPLEMENTARY MATERIALS

### Assessment of *HMGA2* and *PLAG1* rearrangements in breast adenomyoepitheliomas

Pareja et al.

**Supplementary Figure 1**

**Supplementary Table 1**

**Supplementary Figure 1**

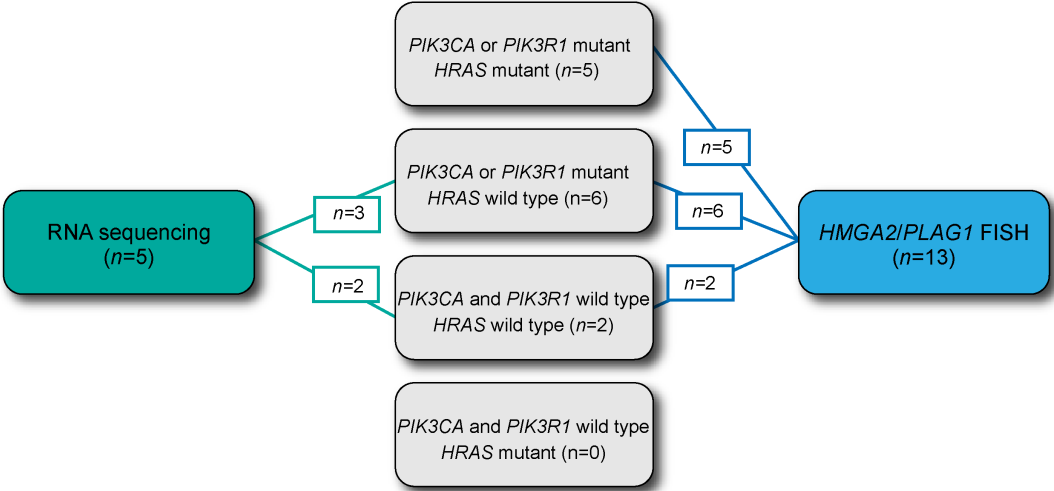

**Supplementary Figure 1: Schematic representation of the cases and analyses conducted in this study.**

Depiction of the *PIK3CA*, *PIK3R1* and *HRAS* status of the breast adenomyopitheliomas included in this series, and the analyses conducted in this study. FISH, fluorescence *in situ* hybridization.

**Supplementary Table 1: List of fusion genes and/or read-throughs identified by RNA-sequencing analysis of breast adenomyoepitheliomas.**

| Sample ID | Fusion caller* | 5' gene | 3' gene  | Mapping 5'     | Mapping 3'     | Spanning reads | Encompassing reads | In-frame | Type              | Driver probability (Oncofuse) | Remarks                            |
|-----------|----------------|---------|----------|----------------|----------------|----------------|--------------------|----------|-------------------|-------------------------------|------------------------------------|
| AM16      | INTEGRATE      | HMGA2   | WIF1     | chr12:66358254 | chr12:65476942 | 8              | 13                 | Yes      | Intra-Chromosomal | 0.082892348                   | No start codon for 3' partner gene |
| AM2       | INTEGRATE      | EEF1A1  | PAN3     | chr6:74229617  | chr13:28788787 | 4              | 3                  | Yes      | Inter-Chromosomal | 0.288187631                   | Intronic breakpoint                |
| AM7       | INTEGRATE      | RRP7B   | KCTD19   | chr22:42961117 | chr16:67355607 | 22             | 8                  | No       | Inter-Chromosomal | 0.047062962                   |                                    |
| AM7       | INTEGRATE      | GRM5    | SCARNA9  | chr11:88345973 | chr11:93454952 | 4              | 2                  | No       | Intra-Chromosomal | 0.021825573                   |                                    |
| AM7       | INTEGRATE      | GRM5    | KIAA1731 | chr11:88345973 | chr11:93454952 | 3              | 2                  | No       | Intra-Chromosomal | 0.021825573                   |                                    |

\*deFuse did not identify any candidates not found in normal breast or that can be mapped to RefSeq genes.
